# Supplementary material for: Is Cadmium Toxicity Tissue-Specific? Toxicogenomics Studies Reveal Common and Specific Pathways in Pulmonary, Hepatic, and Neuronal Cell Models
Source: MDPI journal article supplement (doi:10.3390/ijms23031768), 2022-02-04
Supplement: s1 [file s1]

**Table S1.** Regulated genes (up and down) in common in hepatic (HepG2), pulmonary (A549), and neuronal (SH-SY5Y) cell models exposed to Cd for 24 hours.

| Gene      | AveExpr.<br>A549 | AveExpr.<br>SHSY5Y | AveExpr.<br>HepG2 | logFC.10<br>A549 | logFC.20<br>A549 | logFC.10<br>SHSY5Y | logFC.20<br>SHSY5Y | logFC.10<br>HepG2 | logFC.20<br>HepG2 | adj.P.Val.10<br>A549 | adj.P.Val.20<br>A549 | adj.P.Val.10<br>SHSY5Y | adj.P.Val.20<br>SHSY5Y | adj.P.Val.2<br>HepG2 | adj.P.Val.10<br>HepG2 | Description                                        |
|-----------|------------------|--------------------|-------------------|------------------|------------------|--------------------|--------------------|-------------------|-------------------|----------------------|----------------------|------------------------|------------------------|----------------------|-----------------------|----------------------------------------------------|
| AMDHD1    | 9,2              | 6,6                | 9                 | -0,5             | -0,7             | -0,4               | -0,5               | -0,4              | -1,3              | 0,25139456           | 0,03033218           | 0,15398746             | 0,01571098             | 0,9457244            | 0,0040933             | amidohydrolase domain containing 1                 |
| BATF      | 6,1              | 7,3                | 9,9               | 0,6              | 0,9              | 1,2                | 2,8                | 0,6               | 2,5               | 0,20794761           | 0,02888374           | 0,43993755             | 0,01998279             | 0,945262             | 0,00127735            | basic leucine zipper ATF-like transcription factor |
| CATSPER1  | 7,6              | 6,2                | 6,6               | 0,6              | 0,8              | 0,9                | 1,5                | 0,6               | 1,6               | 0,12146093           | 0,01398132           | 0,02635297             | 0,00096511             | 0,9997134            | 0,02377807            | cation channel sperm associated 1                  |
| CCL26     | 8,9              | 5,9                | 7,1               | 0,5              | 0,8              | 0,6                | 1,2                | 1,8               | 3,7               | 0,24471985           | 0,0176621            | 0,40246302             | 0,02484106             | 0,0632238            | 0,0002156             | 26                                                 |
| CREB5     | 5,9              | 7,1                | 6,5               | 0,4              | 0,7              | 0,7                | 1,4                | 0,3               | 1,4               | 0,1834035            | 0,00838282           | 0,05297719             | 0,00096511             | 0,9904707            | 0,00119961            | cAMP responsive element binding protein 5          |
| FBXL19    | 11,5             | 10                 | 10,4              | 1,6              | 1,7              | 0,5                | 0,6                | 0,8               | 1,3               | 7,71E-05             | 3,63E-05             | 0,12168639             | 0,01621177             | 0,5732982            | 0,00413852            | F-box and leucine rich repeat protein 19           |
| GADD45B   | 12,6             | 10,6               | 10,1              | 0,6              | 0,9              | 5,5                | 7,7                | 0,7               | 3,3               | 0,08717041           | 0,00559998           | 0,01122615             | 0,00055863             | 0,5198574            | 8,87E-05              | growth arrest and DNA damage inducible beta        |
| GADD45G   | 6,5              | 10,3               | 7,5               | 0,3              | 0,5              | 1,2                | 3,2                | 1,1               | 4,9               | 0,2339901            | 0,02478063           | 0,36732925             | 0,00857652             | 0,4631329            | 8,87E-05              | growth arrest and DNA damage inducible gamma       |
| HSPA1A    | 15,5             | 14,2               | 13,5              | 1,1              | 2                | 2,4                | 4,1                | 0,4               | 3                 | 0,07657072           | 0,00145018           | 0,09556278             | 0,00324922             | 0,9997134            | 0,00069383            | heat shock protein family A (Hsp70) member 1A      |
| HSPA6     | 7,5              | 9,5                | 8                 | 1,1              | 1,6              | 4,3                | 6,4                | 2                 | 5,6               | 0,00239558           | 0,00010377           | 0,01315248             | 0,00055859             | 0,109739             | 9,60E-05              | heat shock protein family A (Hsp70) member 6       |
| IFRD1     | 10,9             | 10                 | 10,8              | 0,4              | 0,7              | 0,4                | 0,9                | 0,3               | 0,7               | 0,32942473           | 0,04290565           | 0,40752718             | 0,01421756             | 0,9120202            | 0,00636209            | interferon related developmental regulator 1       |
| IL11      | 10,7             | 8,7                | 10,1              | 0,9              | 1,4              | 1,6                | 2,7                | 0,8               | 3,2               | 0,12146093           | 0,0048584            | 0,0391443              | 0,00101022             | 0,643273             | 0,00025195            | interleukin 11                                     |
| KAZALD1   | 9,1              | 8,2                | 10,3              | -0,5             | -0,8             | -0,4               | -0,8               | -0,4              | -1,2              | 0,27784371           | 0,0249525            | 0,1712005              | 0,00628738             | 0,9854096            | 0,00789259            | Kazal type serine peptidase inhibitor domain 1     |
| KLHDC9    | 8,4              | 7,9                | 9,6               | -0,6             | -1               | -0,6               | -1,1               | -0,2              | -0,7              | 0,13317157           | 0,00621907           | 0,15612226             | 0,00582294             | 0,9997134            | 0,02149352            | kelch domain containing 9                          |
| LAMB3     | 11,7             | 8                  | 9,3               | 0,4              | 0,7              | 2,2                | 3,7                | 0,9               | 4                 | 0,19798177           | 0,01218963           | 0,05635801             | 0,00166856             | 0,9997134            | 0,00205931            | laminin subunit beta 3                             |
| LOC388242 | 13               | 8,3                | 9,4               | 0,6              | 0,7              | 1,2                | 1,3                | 0,3               | 0,8               | 0,0674357            | 0,0205932            | 0,00707905             | 0,0009668              | 0,9591153            | 0,00810221            | SAGA complex associated factor 29 pseudogene       |
| MLC1      | 6,6              | 8,6                | 6,7               | 1,5              | 2,6              | 3,5                | 5,5                | 0,9               | 3,7               | 0,15080498           | 0,0048584            | 0,0667328              | 0,00279908             | 0,4265658            | 9,59E-05              | 1                                                  |
| MT1A      | 17,3             | 16,1               | 16                | 2,8              | 2,8              | 5,1                | 5,5                | 3                 | 3,1               | 4,75E-05             | 4,05E-05             | 1,48E-06               | 5,54E-07               | 0,0081143            | 0,00064437            | metallothionein 1A                                 |
| MT1B      | 16,8             | 15,3               | 15,7              | 3,4              | 3,5              | 6,1                | 6,2                | 3,5               | 3,7               | 6,59E-07             | 5,05E-07             | 7,96E-08               | 3,34E-08               | 0,0080946            | 0,00046514            | metallothionein 1B                                 |
| MT1E      | 9,5              | 11,7               | 11,4              | 1,5              | 1,5              | 6,3                | 6,6                | 2,4               | 2,9               | 0,00017569           | 0,00011523           | 1,48E-06               | 5,54E-07               | 0,0632238            | 0,00151072            | metallothionein 1E                                 |
| MT1F      | 14,9             | 13,6               | 13,3              | 4,3              | 4,5              | 5,7                | 5,9                | 3,5               | 3,3               | 3,45E-06             | 2,40E-06             | 1,48E-06               | 5,54E-07               | 0,0340246            | 0,002344              | metallothionein 1F                                 |
| MT1G      | 10,7             | 8,4                | 14,8              | 6,7              | 6,8              | 3,7                | 4,5                | 3,7               | 3,8               | 9,30E-07             | 8,73E-07             | 0,002024               | 0,00021357             | 0,0088442            | 0,00077032            | metallothionein 1G                                 |
| MT1H      | 7,8              | 6,2                | 15,8              | 3,7              | 3,8              | 1,3                | 1,6                | 3,5               | 3,6               | 2,24E-05             | 1,56E-05             | 0,00834876             | 0,00062208             | 0,0081143            | 0,00067589            | metallothionein 1H                                 |
| MT1L      | 16,4             | 14,2               | 15,9              | 3,3              | 3,3              | 5,3                | 5,6                | 3,3               | 3,4               | 6,67E-07             | 5,20E-07             | 1,28E-05               | 3,35E-06               | 0,0081143            | 0,00060896            | pseudogene                                         |
| MT1M      | 5,8              | 12,3               | 14,7              | 0,7              | 0,7              | 9,9                | 10,3               | 3,5               | 3,6               | 0,03312847           | 0,0120383            | 1,48E-06               | 5,54E-07               | 0,0299446            | 0,00154552            | metallothionein 1M                                 |
| MT1X      | 15,6             | 14,3               | 15,8              | 4,6              | 4,9              | 6,4                | 6,7                | 3,5               | 3,7               | 1,95E-07             | 1,15E-07             | 1,26E-08               | 4,52E-09               | 0,0080946            | 0,00048298            | metallothionein 1X                                 |
| MT2A      | 17,3             | 15,8               | 16,6              | 1,3              | 1,2              | 3,5                | 3,4                | 1,6               | 1,8               | 0,00044933           | 0,00057602           | 3,10E-06               | 1,83E-06               | 0,0715937            | 0,00243717            | metallothionein 2A                                 |
| OTUB2     | 7,3              | 7,4                | 7,5               | 1,1              | 1,3              | 0,8                | 0,8                | 0,4               | 1,8               | 0,00651478           | 0,00124658           | 0,00935147             | 0,00125484             | 0,5822455            | 0,00012592            | ubiquitin aldehyde binding 2                       |
| PPP1R15A  | 9,7              | 10                 | 9,3               | 0,9              | 1,8              | 1,6                | 3,1                | 0,6               | 3,1               | 0,06233089           | 0,00042734           | 0,17125605             | 0,00533278             | 0,9079092            | 0,00057019            | protein phosphatase 1 regulatory subunit 15A       |
| RAB26     | 11,5             | 8,7                | 7,6               | -0,8             | -1,2             | -0,5               | -1                 | -0,4              | -1,1              | 0,14198852           | 0,01249787           | 0,51180842             | 0,04203412             | 0,7431268            | 0,00192278            | RAB26, member RAS oncogene family                  |
| RAB3B     | 9,8              | 7                  | 8,6               | 0,5              | 1                | 0,4                | 0,6                | 0,7               | 2,8               | 0,20394935           | 0,00538389           | 0,09155064             | 0,00468029             | 0,6243907            | 0,00024742            | RAB3B, member RAS oncogene family                  |
| SERPINB8  | 7,4              | 6,4                | 8,8               | 0,9              | 1,1              | 1                  | 1,6                | 0,6               | 1,7               | 0,023821             | 0,00407349           | 0,1851281              | 0,00866941             | 0,9457244            | 0,00641039            | serpin family B member 8                           |
| SIRT6     | 9,9              | 10,1               | 9                 | 0,4              | 0,7              | 0,5                | 0,9                | 0,3               | 0,7               | 0,28003399           | 0,01940125           | 0,21194635             | 0,01186799             | 0,9997134            | 0,04425327            | sirtuin 6                                          |
| SYT11     | 6,4              | 10,7               | 5,9               | 1                | 1,6              | 0,5                | 0,7                | 0,2               | 1,3               | 0,04566584           | 0,00098203           | 0,1316459              | 0,00935158             | 0,9997134            | 0,00261459            | synaptotagmin 11                                   |
| TMEM54    | 13               | 12,2               | 8,1               | 0,4              | 0,8              | 0,5                | 0,7                | 0,8               | 1,4               | 0,32056332           | 0,04324383           | 0,13120964             | 0,00802322             | 0,141681             | 0,00052364            | transmembrane protein 54                           |
| VCY       | 7,8              | 6,5                | 7,1               | 0,4              | 0,8              | 0,3                | 0,9                | 0,3               | 1                 | 0,36660865           | 0,03500513           | 0,50520761             | 0,01517863             | 0,8412789            | 0,00270785            | variable charge Y-linked                           |
