# Supplementary material for: Is Cadmium Toxicity Tissue-Specific? Toxicogenomics Studies Reveal Common and Specific Pathways in Pulmonary, Hepatic, and Neuronal Cell Models
Source: MDPI journal article supplement (doi:10.3390/ijms23031768), 2022-02-04
Supplement: s1 [file s1]

**Table S4.** Comparison of regulated genes (up and down) in common in hepatic (HepG2) and neuronal (SH-SY5Y) cell models exposed to Cd for 24 hours.

| Gene             | AveExpr.<br>HEPG2 | AveExpr.<br>SHSY5Y | logFC.2.<br>HEPG2 | logFC.10.<br>HEPG2 | logFC.10.<br>SHSY5Y | logFC.20.<br>SHSY5Y | adj.P.Val.2<br>.HEPG2 | adj.P.Val.10<br>.HEPG2 | adj.P.Val.10.<br>SHSY5Y | adj.P.Val.20.<br>SHSY5Y | Description                                                          |
|------------------|-------------------|--------------------|-------------------|--------------------|---------------------|---------------------|-----------------------|------------------------|-------------------------|-------------------------|----------------------------------------------------------------------|
| <i>RRAD</i>      | 9,78              | 8,67               | 1,38              | 4,77               | 3,27                | 5,42                | 0,2586251             | 9,59E-05               | 0,01895891              | 0,00054007              | RRAD, Ras related glycolysis inhibitor and calcium channel regulator |
| <i>CRYAB</i>     | 9,93              | 8,85               | 2,34              | 3,75               | 3,19                | 4,90                | 0,5822455             | 0,00651583             | 0,02969749              | 0,00102735              | crystallin alpha B                                                   |
| <i>GDF15</i>     | 16,33             | 13,24              | 0,68              | 1,64               | 3,88                | 4,39                | 0,3332181             | 0,00035957             | 1,28E-05                | 2,70E-06                | growth differentiation factor 15                                     |
| <i>PHLDA2</i>    | 11,92             | 8,99               | 0,85              | 2,27               | 2,76                | 3,63                | 0,624695              | 0,00085255             | 0,00205452              | 0,00014817              | pleckstrin homology like domain family A member 2                    |
| <i>EGR1</i>      | 10,83             | 10,89              | 1,71              | 3,03               | 2,22                | 3,43                | 0,4170229             | 0,00165712             | 0,00495221              | 0,00014299              | early growth response 1                                              |
| <i>EGR4</i>      | 7,71              | 7,06               | 1,16              | 3,17               | 1,56                | 3,08                | 0,4122072             | 0,00029952             | 0,1031971               | 0,00216855              | early growth response 4                                              |
| <i>S100A2</i>    | 10,74             | 8,82               | 0,63              | 2,49               | 1,43                | 2,55                | 0,9997134             | 0,01418106             | 0,17283823              | 0,00677338              | S100 calcium binding protein A2                                      |
| <i>TNFRSF12A</i> | 13,61             | 11,60              | 0,55              | 1,84               | 1,67                | 2,45                | 0,7431268             | 0,00080162             | 0,00114454              | 3,81E-05                | TNF receptor superfamily member 12A                                  |
| <i>VCX2</i>      | 6,68              | 7,47               | 0,61              | 1,46               | 1,12                | 2,44                | 0,4122072             | 0,00049847             | 0,27033364              | 0,00836725              | variable charge X-linked 2                                           |
| <i>S100A16</i>   | 12,84             | 9,51               | 0,38              | 1,45               | 1,93                | 2,32                | 0,9781613             | 0,00376695             | 0,00021203              | 2,58E-05                | S100 calcium binding protein A16                                     |
| <i>CCR7</i>      | 6,81              | 6,57               | 0,36              | 2,50               | 1,09                | 2,18                | 0,9997134             | 0,00215558             | 0,31306989              | 0,01567391              | C-C motif chemokine receptor 7                                       |
| <i>CTAG1A</i>    | 6,46              | 6,65               | 0,35              | 1,22               | 1,28                | 2,18                | 0,7431268             | 0,00067429             | 0,15227671              | 0,0064615               | cancer/testis antigen 1A                                             |
| <i>CDKN1A</i>    | 10,94             | 8,24               | 0,41              | 1,25               | 1,74                | 2,13                | 0,6308422             | 0,00056573             | 0,00015113              | 1,59E-05                | cyclin dependent kinase inhibitor 1A                                 |
| <i>DUSP13</i>    | 11,33             | 6,38               | 0,50              | 1,30               | 1,42                | 2,13                | 0,5163662             | 0,00059822             | 0,07104082              | 0,0036338               | dual specificity phosphatase 13                                      |
| <i>FOS</i>       | 7,02              | 7,43               | 1,03              | 3,36               | 1,08                | 2,12                | 0,7431268             | 0,00077032             | 0,1380698               | 0,0036294               | Fos proto-oncogene, AP-1 transcription factor subunit                |
| <i>SERTAD1</i>   | 12,48             | 11,48              | 0,27              | 1,35               | 1,06                | 1,93                | 0,9457244             | 0,00077213             | 0,09232403              | 0,00251419              | SERTA domain containing 1                                            |
| <i>FTCD</i>      | 12,07             | 6,81               | -0,33             | -0,92              | 0,97                | 1,86                | 0,9830101             | 0,01586045             | 0,17472191              | 0,00550642              | formimidoyltransferase cyclodeaminase                                |
| <i>ASB2</i>      | 10,62             | 6,30               | 1,09              | 3,22               | 0,73                | 1,76                | 0,8066405             | 0,00190336             | 0,39911533              | 0,01532287              | ankyrin repeat and SOCS box containing 2                             |
| <i>HSPB2</i>     | 5,95              | 6,00               | 0,40              | 0,97               | 0,87                | 1,71                | 0,8281899             | 0,00585861             | 0,28121556              | 0,01289476              | heat shock protein family B (small) member 2                         |
| <i>CNN1</i>      | 9,50              | 7,71               | 0,64              | 1,70               | 0,97                | 1,62                | 0,6308422             | 0,00103167             | 0,01802211              | 0,00044049              | calponin 1                                                           |
| <i>C1S</i>       | 10,54             | 5,94               | -0,52             | -1,16              | 0,77                | 1,56                | 0,8930622             | 0,01559353             | 0,15375417              | 0,00385192              | complement C1s                                                       |
| <i>SQSTM1</i>    | 9,40              | 11,77              | 0,22              | 0,59               | 0,81                | 1,54                | 0,9120202             | 0,00797432             | 0,13990746              | 0,00395575              | sequestosome 1                                                       |
| <i>SNAIL</i>     | 8,85              | 11,39              | 0,65              | 3,37               | 0,82                | 1,52                | 0,6364837             | 9,60E-05               | 0,23858724              | 0,0109698               | snail family transcriptional repressor 1                             |
| <i>NUPR1</i>     | 13,83             | 6,81               | -0,68             | -1,08              | 0,61                | 1,52                | 0,8066405             | 0,02966169             | 0,48680701              | 0,02743746              | nuclear protein 1, transcriptional regulator                         |
| <i>CLDN4</i>     | 9,33              | 7,47               | 0,26              | 1,07               | 0,97                | 1,44                | 0,9869505             | 0,00295104             | 0,03884881              | 0,00174909              | claudin 4                                                            |
| <i>S100A10</i>   | 13,85             | 10,85              | 0,24              | 0,91               | 1,21                | 1,42                | 0,9730186             | 0,0034463              | 0,09556278              | 0,010811                | S100 calcium binding protein A10                                     |
| <i>ARC</i>       | 6,66              | 8,98               | 0,95              | 3,88               | 0,57                | 1,40                | 0,4610304             | 9,60E-05               | 0,15233523              | 0,00179175              | activity regulated cytoskeleton associated protein                   |

|                  |       |       |       |       |      |      |           |            |            |            |                                                |
|------------------|-------|-------|-------|-------|------|------|-----------|------------|------------|------------|------------------------------------------------|
| <i>SPINT2</i>    | 8,13  | 6,79  | 0,37  | 1,83  | 0,77 | 1,39 | 0,9997134 | 0,00893247 | 0,02272901 | 0,00041057 | serine peptidase inhibitor, Kunitz type 2      |
| <i>RASD1</i>     | 10,58 | 7,79  | 0,80  | 2,26  | 0,80 | 1,38 | 0,2204806 | 0,00014455 | 0,1380698  | 0,0052742  | ras related dexamethasone induced 1            |
| <i>IER3</i>      | 12,96 | 6,60  | 1,01  | 1,67  | 0,96 | 1,35 | 0,5851437 | 0,00617095 | 0,09611115 | 0,00617159 | immediate early response 3                     |
| <i>AGT</i>       | 15,74 | 6,91  | -0,40 | -1,25 | 1,20 | 1,34 | 0,643273  | 0,00065593 | 0,00121972 | 0,00021382 | angiotensinogen                                |
| <i>FHL2</i>      | 13,98 | 8,49  | 0,56  | 2,37  | 0,58 | 1,33 | 0,901611  | 0,00099146 | 0,28112183 | 0,00763871 | four and a half LIM domains 2                  |
| <i>ICAM2</i>     | 11,59 | 10,33 | 0,40  | 1,42  | 1,16 | 1,31 | 0,9997134 | 0,02118213 | 0,00205452 | 0,00036423 | intercellular adhesion molecule 2              |
| <i>HBEGF</i>     | 7,07  | 7,43  | 0,26  | 1,35  | 0,87 | 1,29 | 0,8639199 | 0,00033956 | 0,07843133 | 0,00410067 | heparin binding EGF like growth factor         |
| <i>SDCBP2</i>    | 7,05  | 6,83  | 0,37  | 1,21  | 0,66 | 1,28 | 0,9869505 | 0,0081627  | 0,23956246 | 0,00928233 | syndecan binding protein 2                     |
| <i>BIK</i>       | 8,35  | 6,24  | 0,22  | 1,60  | 0,71 | 1,27 | 0,9997134 | 0,01613489 | 0,04935866 | 0,00105305 | BCL2 interacting killer                        |
| <i>FLNC</i>      | 5,51  | 8,34  | 0,22  | 1,14  | 0,70 | 1,26 | 0,9997134 | 0,00199528 | 0,05668297 | 0,00123707 | filamin C                                      |
| <i>KRT19</i>     | 17,35 | 8,66  | 0,33  | 1,31  | 0,78 | 1,26 | 0,9997134 | 0,01049652 | 0,2770227  | 0,02329127 | keratin 19                                     |
| <i>TXNRD1</i>    | 10,78 | 8,73  | 0,21  | 0,83  | 0,82 | 1,24 | 0,9997134 | 0,0359167  | 0,17080065 | 0,01126703 | thioredoxin reductase 1                        |
| <i>PROCR</i>     | 10,79 | 7,38  | 0,34  | 1,93  | 0,95 | 1,23 | 0,9997134 | 0,00300426 | 0,01492759 | 0,0011348  | protein C receptor                             |
| <i>ZFP36</i>     | 9,11  | 9,27  | 0,71  | 1,90  | 0,66 | 1,21 | 0,8066405 | 0,00301287 | 0,08882025 | 0,00220445 | ZFP36 ring finger protein                      |
| <i>SAT1</i>      | 14,89 | 7,38  | 0,71  | 1,45  | 0,65 | 1,21 | 0,9120202 | 0,02443531 | 0,06310594 | 0,00123707 | spermidine/spermine N1-acetyltransferase 1     |
| <i>IL15</i>      | 6,57  | 8,06  | 0,25  | 0,57  | 1,01 | 1,21 | 0,9591153 | 0,02895043 | 0,00980225 | 0,00096511 | interleukin 15                                 |
| <i>TAGLN</i>     | 12,61 | 7,02  | 0,45  | 1,37  | 0,60 | 1,18 | 0,6933351 | 0,00082549 | 0,03119668 | 0,00041057 | transgelin                                     |
| <i>GABARAPL1</i> | 8,80  | 8,42  | 0,24  | 1,34  | 0,71 | 1,16 | 0,94953   | 0,00049847 | 0,13928209 | 0,00628738 | GABA type A receptor associated protein like 1 |
| <i>ACTA1</i>     | 13,48 | 6,30  | 1,15  | 2,14  | 0,40 | 1,14 | 0,875209  | 0,02758283 | 0,34595156 | 0,00652876 | actin alpha 1, skeletal muscle                 |
| <i>MVP</i>       | 13,93 | 10,77 | 0,33  | 1,14  | 0,96 | 1,13 | 0,8639199 | 0,00146913 | 0,00705371 | 0,00076972 | major vault protein                            |
| <i>RELB</i>      | 12,22 | 10,01 | 0,42  | 1,62  | 0,91 | 1,12 | 0,7431268 | 0,00048298 | 0,03876553 | 0,0036338  | RELB proto-oncogene, NF-kB subunit             |
| <i>FOSL1</i>     | 7,79  | 6,48  | 0,55  | 1,24  | 0,32 | 1,11 | 0,8257088 | 0,00770497 | 0,69698571 | 0,04482117 | FOS like 1, AP-1 transcription factor subunit  |
| <i>S100A11</i>   | 10,30 | 11,18 | 0,45  | 1,68  | 0,72 | 1,11 | 0,9997134 | 0,02805579 | 0,06333648 | 0,00291644 | S100 calcium binding protein A11               |
| <i>PLK3</i>      | 12,10 | 10,21 | 0,42  | 1,31  | 0,79 | 1,10 | 0,9591153 | 0,00758166 | 0,0135679  | 0,00082276 | polo like kinase 3                             |
| <i>SPOCD1</i>    | 6,76  | 5,81  | 0,41  | 1,79  | 0,82 | 1,10 | 0,6976716 | 0,00023525 | 0,00678713 | 0,00041057 | SPOC domain containing 1                       |
| <i>TIMP1</i>     | 10,02 | 10,31 | 0,60  | 1,53  | 0,90 | 1,08 | 0,6189363 | 0,00099251 | 0,0135679  | 0,00141522 | TIMP metalloproteinase inhibitor 1             |
| <i>MAFF</i>      | 8,41  | 7,27  | 0,58  | 1,96  | 0,43 | 1,03 | 0,7483777 | 0,00081789 | 0,19969548 | 0,00353386 | MAF bZIP transcription factor F                |
| <i>UPP1</i>      | 8,26  | 9,17  | 0,49  | 0,99  | 0,68 | 1,02 | 0,7862474 | 0,00981541 | 0,04935866 | 0,00216855 | uridine phosphorylase 1                        |
| <i>ACTG2</i>     | 7,91  | 6,63  | 0,26  | 1,34  | 0,61 | 1,01 | 0,9997134 | 0,02065803 | 0,23967716 | 0,01538857 | actin gamma 2, smooth muscle                   |
| <i>TUBA4A</i>    | 12,09 | 8,43  | 0,22  | 1,16  | 0,53 | 1,01 | 0,9997134 | 0,019689   | 0,34030334 | 0,02201381 | tubulin alpha 4a                               |
| <i>SRXN1</i>     | 13,25 | 11,74 | 0,35  | 0,85  | 0,49 | 0,99 | 0,9248016 | 0,01278852 | 0,32115961 | 0,01571098 | sulfiredoxin 1                                 |

|                 |       |       |       |       |      |      |           |            |            |            |                                                            |
|-----------------|-------|-------|-------|-------|------|------|-----------|------------|------------|------------|------------------------------------------------------------|
| <i>SERPINE2</i> | 11,22 | 6,52  | 0,84  | 2,37  | 0,32 | 0,98 | 0,9591153 | 0,01100556 | 0,40177006 | 0,00767612 | serpin family E member 2                                   |
| <i>NPPB</i>     | 9,36  | 6,01  | 0,99  | 3,13  | 0,50 | 0,98 | 0,8066405 | 0,00141847 | 0,19349796 | 0,00601793 | natriuretic peptide B                                      |
| <i>CILP</i>     | 5,62  | 6,54  | 0,26  | 1,57  | 0,74 | 0,98 | 0,9997134 | 0,00212986 | 0,02427443 | 0,00165812 | cartilage intermediate layer protein                       |
| <i>IL6R</i>     | 8,86  | 5,96  | 0,22  | 0,98  | 0,42 | 0,96 | 0,9997134 | 0,00417584 | 0,20716531 | 0,00410067 | interleukin 6 receptor                                     |
| <i>MAFK</i>     | 8,02  | 8,51  | 0,23  | 0,70  | 0,56 | 0,94 | 0,9464353 | 0,00674754 | 0,09177614 | 0,00324922 | MAF bZIP transcription factor K                            |
| <i>HTRA3</i>    | 6,61  | 5,84  | 0,60  | 2,44  | 0,46 | 0,92 | 0,5822445 | 0,00014455 | 0,40177006 | 0,02817497 | HtrA serine peptidase 3                                    |
| <i>CCK</i>      | 6,31  | 5,70  | 0,48  | 2,10  | 0,47 | 0,92 | 0,9333199 | 0,00106016 | 0,18485161 | 0,00573815 | cholecystokinin                                            |
| <i>OSBPL10</i>  | 9,36  | 6,86  | 0,21  | 1,06  | 0,69 | 0,90 | 0,9997134 | 0,00463047 | 0,11321801 | 0,00894825 | oxysterol binding protein like 10                          |
| <i>APOH</i>     | 16,66 | 5,58  | -0,23 | -1,28 | 0,65 | 0,90 | 0,9997134 | 0,00305542 | 0,08200806 | 0,0052742  | apolipoprotein H                                           |
| <i>MICALL2</i>  | 10,11 | 10,67 | 0,33  | 0,85  | 0,59 | 0,89 | 0,8639199 | 0,00599455 | 0,0905736  | 0,00444026 | MICAL like 2                                               |
| <i>S100A3</i>   | 9,06  | 5,88  | 0,30  | 2,13  | 0,67 | 0,89 | 0,9997134 | 0,02430607 | 0,04686709 | 0,00342679 | S100 calcium binding protein A3                            |
| <i>EPHA2</i>    | 10,14 | 7,14  | 0,73  | 1,80  | 0,48 | 0,89 | 0,6507079 | 0,00172011 | 0,21726903 | 0,00867218 | EPH receptor A2                                            |
| <i>RAB31</i>    | 7,95  | 10,68 | 0,32  | 1,31  | 0,70 | 0,88 | 0,9444595 | 0,00150786 | 0,08402899 | 0,00713809 | RAB31, member RAS oncogene family                          |
| <i>EGR2</i>     | 5,91  | 6,00  | 0,36  | 1,22  | 0,45 | 0,87 | 0,9740075 | 0,00576384 | 0,17125605 | 0,0052742  | early growth response 2                                    |
| <i>MGLL</i>     | 6,77  | 8,60  | 0,30  | 1,48  | 0,31 | 0,87 | 0,9997134 | 0,00490887 | 0,40933999 | 0,010811   | monoglyceride lipase                                       |
|                 |       |       |       |       |      |      |           |            |            |            | transient receptor potential cation channel subfamily V    |
| <i>TRPV2</i>    | 12,61 | 7,21  | 0,30  | 1,64  | 0,63 | 0,86 | 0,9997134 | 0,00143437 | 0,03876553 | 0,00251419 | member 2                                                   |
| <i>CNN2</i>     | 11,67 | 8,80  | 0,33  | 0,56  | 0,55 | 0,84 | 0,8814889 | 0,04057702 | 0,10340148 | 0,0050463  | calponin 2                                                 |
|                 |       |       |       |       |      |      |           |            |            |            | ATP binding cassette subfamily B member 6 (Langereis blood |
| <i>ABCB6</i>    | 12,94 | 12,48 | -0,21 | -0,93 | 0,70 | 0,84 | 0,9997134 | 0,01836176 | 0,00980225 | 0,00096511 | group)                                                     |
| <i>GFPT2</i>    | 6,91  | 7,68  | 0,44  | 2,36  | 0,41 | 0,84 | 0,9997134 | 0,00624361 | 0,1590817  | 0,00385192 | glutamine-fructose-6-phosphate transaminase 2              |
| <i>CSRP1</i>    | 8,98  | 7,60  | 0,24  | 0,67  | 0,65 | 0,83 | 0,9997134 | 0,01874646 | 0,01847893 | 0,00146799 | cysteine and glycine rich protein 1                        |
| <i>SCARA3</i>   | 7,45  | 9,49  | -0,33 | -0,90 | 0,63 | 0,83 | 0,9997134 | 0,04295537 | 0,0135679  | 0,0009668  | scavenger receptor class A member 3                        |
| <i>SFN</i>      | 10,46 | 6,87  | 0,40  | 0,76  | 0,33 | 0,81 | 0,906725  | 0,03225142 | 0,5533971  | 0,04359481 | stratifin                                                  |
| <i>FADS3</i>    | 9,92  | 8,15  | 0,44  | 1,31  | 0,70 | 0,81 | 0,8066405 | 0,0018701  | 0,07818466 | 0,00846482 | fatty acid desaturase 3                                    |
| <i>RAB7B</i>    | 7,29  | 5,74  | 0,33  | 2,04  | 0,73 | 0,79 | 0,9235706 | 0,0002899  | 0,08477448 | 0,0121391  | RAB7B, member RAS oncogene family                          |
| <i>LHX6</i>     | 7,46  | 6,79  | 0,36  | 1,61  | 0,53 | 0,78 | 0,8639199 | 0,00057385 | 0,076197   | 0,00416296 | LIM homeobox 6                                             |
| <i>SH2B3</i>    | 7,54  | 8,20  | 0,30  | 0,73  | 0,41 | 0,72 | 0,8181735 | 0,00489291 | 0,15040848 | 0,00546503 | SH2B adaptor protein 3                                     |
| <i>ASS1</i>     | 10,69 | 6,90  | -0,47 | -1,46 | 0,60 | 0,72 | 0,945262  | 0,00534665 | 0,06553296 | 0,00671395 | argininosuccinate synthase 1                               |
| <i>DUSP1</i>    | 9,70  | 9,13  | 0,22  | 1,49  | 0,29 | 0,71 | 0,9997134 | 0,00167105 | 0,47776373 | 0,02701885 | dual specificity phosphatase 1                             |
| <i>NGFR</i>     | 6,91  | 6,91  | 0,29  | 2,25  | 0,42 | 0,71 | 0,9997134 | 0,00933506 | 0,1312053  | 0,0052307  | nerve growth factor receptor                               |

|                 |       |       |       |       |      |      |           |            |            |            |                                                                                                          |
|-----------------|-------|-------|-------|-------|------|------|-----------|------------|------------|------------|----------------------------------------------------------------------------------------------------------|
| <i>TUBB6</i>    | 14,98 | 14,07 | 0,38  | 1,02  | 0,72 | 0,71 | 0,9255985 | 0,00844006 | 0,0115899  | 0,00276249 | tubulin beta 6 class V                                                                                   |
| <i>NUAK2</i>    | 9,28  | 6,65  | 0,26  | 1,08  | 0,30 | 0,70 | 0,9586893 | 0,00199528 | 0,2572015  | 0,00660702 | NUAK family kinase 2                                                                                     |
| <i>RAB3A</i>    | 7,40  | 10,83 | 0,41  | 1,62  | 0,45 | 0,69 | 0,8232327 | 0,0006482  | 0,11957109 | 0,00652876 | RAB3A, member RAS oncogene family                                                                        |
| <i>SLC6A12</i>  | 6,91  | 6,98  | -0,56 | -1,89 | 0,40 | 0,68 | 0,7431268 | 0,00075298 | 0,1533403  | 0,00665803 | solute carrier family 6 member 12                                                                        |
| <i>NPAS1</i>    | 8,01  | 6,71  | 0,82  | 1,62  | 0,46 | 0,68 | 0,5732982 | 0,00207902 | 0,09029923 | 0,00485382 | neuronal PAS domain protein 1                                                                            |
| <i>KRT80</i>    | 7,28  | 7,56  | 0,28  | 1,59  | 0,27 | 0,68 | 0,9997134 | 0,00489826 | 0,23766575 | 0,00431466 | keratin 80                                                                                               |
| <i>LMTK2</i>    | 6,54  | 8,98  | 0,29  | 0,70  | 0,34 | 0,68 | 0,9591153 | 0,02361637 | 0,2779374  | 0,0127569  | lemur tyrosine kinase 2                                                                                  |
| <i>TGFB1</i>    | 9,31  | 7,84  | 0,48  | 0,88  | 0,58 | 0,67 | 0,6243907 | 0,00434725 | 0,0524278  | 0,00601793 | transforming growth factor beta 1                                                                        |
| <i>PNPLA3</i>   | 10,88 | 6,38  | -0,64 | -1,47 | 0,60 | 0,66 | 0,7431268 | 0,00403897 | 0,02474156 | 0,0036294  | patatin like phospholipase domain containing 3<br>phosphatidylinositol-3,4,5-trisphosphate dependent Rac |
| <i>PREX1</i>    | 6,69  | 9,11  | 0,47  | 1,49  | 0,55 | 0,64 | 0,7431268 | 0,00097174 | 0,04298745 | 0,00492635 | exchange factor 1                                                                                        |
| <i>MAP3K14</i>  | 9,23  | 8,59  | 0,23  | 1,05  | 0,33 | 0,63 | 0,9997134 | 0,00682331 | 0,39803358 | 0,03030424 | mitogen-activated protein kinase kinase kinase 14                                                        |
| <i>PLXND1</i>   | 9,75  | 9,01  | 0,38  | 1,38  | 0,56 | 0,61 | 0,9915628 | 0,00547814 | 0,04081613 | 0,00546391 | plexin D1                                                                                                |
| <i>ARRDC2</i>   | 8,99  | 8,73  | 0,37  | 0,83  | 0,46 | 0,61 | 0,8097407 | 0,00690052 | 0,09185497 | 0,00671395 | arrestin domain containing 2                                                                             |
| <i>KLF5</i>     | 6,97  | 5,81  | 0,57  | 1,60  | 0,36 | 0,60 | 0,4610304 | 0,00033956 | 0,36597727 | 0,03674935 | Kruppel like factor 5                                                                                    |
| <i>PFKP</i>     | 11,10 | 12,24 | 0,76  | 2,09  | 0,37 | 0,59 | 0,8106562 | 0,00295104 | 0,12552455 | 0,00580596 | phosphofructokinase, platelet                                                                            |
| <i>SOCS1</i>    | 7,73  | 6,45  | -0,24 | -0,63 | 0,29 | 0,59 | 0,9997134 | 0,04992086 | 0,39139346 | 0,02572144 | suppressor of cytokine signaling 1                                                                       |
| <i>IL4R</i>     | 14,44 | 5,79  | 0,39  | 1,27  | 0,40 | 0,59 | 0,9061084 | 0,00315166 | 0,19599764 | 0,01517863 | interleukin 4 receptor                                                                                   |
| <i>NTNG2</i>    | 6,39  | 7,70  | 0,23  | 1,12  | 0,40 | 0,59 | 0,9997134 | 0,00213997 | 0,1359844  | 0,00816702 | netrin G2                                                                                                |
| <i>RHOB</i>     | 9,52  | 9,26  | 0,38  | 0,81  | 0,32 | 0,57 | 0,7483777 | 0,00645887 | 0,20046848 | 0,00842251 | ras homolog family member B                                                                              |
| <i>FBLIM1</i>   | 9,39  | 8,37  | 0,45  | 1,72  | 0,23 | 0,56 | 0,9997134 | 0,00880052 | 0,27463723 | 0,00618685 | filamin binding LIM protein 1                                                                            |
| <i>NR1D1</i>    | 9,02  | 7,29  | 0,44  | 0,66  | 0,39 | 0,56 | 0,7431268 | 0,02527872 | 0,23744565 | 0,02305668 | nuclear receptor subfamily 1 group D member 1                                                            |
| <i>GAL3ST1</i>  | 10,62 | 8,49  | -0,27 | -1,24 | 0,63 | 0,54 | 0,9997134 | 0,03607393 | 0,15040848 | 0,04763102 | galactose-3-O-sulfotransferase 1                                                                         |
| <i>S100A6</i>   | 14,05 | 12,90 | 0,30  | 1,85  | 0,30 | 0,54 | 0,9997134 | 0,02908325 | 0,18699216 | 0,00713597 | S100 calcium binding protein A6                                                                          |
| <i>SEC14L1</i>  | 9,49  | 10,50 | 0,25  | 0,94  | 0,23 | 0,54 | 0,9571375 | 0,00282804 | 0,46756516 | 0,02626713 | SEC14 like lipid binding 1                                                                               |
| <i>ADORA2B</i>  | 10,79 | 8,76  | 0,20  | 0,61  | 0,63 | 0,53 | 0,9997134 | 0,02908325 | 0,06304956 | 0,01817274 | adenosine A2b receptor                                                                                   |
| <i>CYP1A1</i>   | 9,63  | 5,97  | 0,68  | 2,97  | 0,41 | 0,53 | 0,9997134 | 0,01113399 | 0,23967716 | 0,03168983 | cytochrome P450 family 1 subfamily A member 1                                                            |
| <i>C1orf115</i> | 10,39 | 6,46  | -0,53 | -1,22 | 0,55 | 0,53 | 0,6623391 | 0,00251659 | 0,05852524 | 0,01158566 | chromosome 1 open reading frame 115                                                                      |
| <i>RGS2</i>     | 8,18  | 12,03 | 0,59  | 2,67  | 0,40 | 0,52 | 0,7431268 | 0,00027927 | 0,12840094 | 0,01160481 | regulator of G protein signaling 2                                                                       |
| <i>HSPB8</i>    | 7,05  | 5,84  | 0,51  | 2,01  | 0,32 | 0,52 | 0,9457244 | 0,00201157 | 0,24105407 | 0,01646497 | heat shock protein family B (small) member 8                                                             |
| <i>TGFB11</i>   | 7,56  | 11,98 | 0,52  | 1,94  | 0,41 | 0,52 | 0,9997134 | 0,00657    | 0,06751142 | 0,00601793 | transforming growth factor beta 1 induced transcript 1                                                   |

|                  |       |       |       |       |       |       |           |            |            |            |                                                                                                       |
|------------------|-------|-------|-------|-------|-------|-------|-----------|------------|------------|------------|-------------------------------------------------------------------------------------------------------|
| <i>MLLT11</i>    | 9,06  | 15,42 | 0,67  | 2,40  | 0,42  | 0,52  | 0,7550777 | 0,00069232 | 0,20058027 | 0,0264639  | MLLT11 transcription factor 7 cofactor                                                                |
| <i>PDZK1</i>     | 10,92 | 8,46  | -0,37 | -0,68 | 0,24  | 0,52  | 0,928039  | 0,03978716 | 0,28121556 | 0,0093638  | PDZ domain containing 1                                                                               |
| <i>GPR137B</i>   | 6,83  | 8,37  | 0,35  | 1,29  | 0,22  | 0,51  | 0,9303207 | 0,00212986 | 0,34616837 | 0,01240204 | G protein-coupled receptor 137B                                                                       |
| <i>LMNA</i>      | 14,19 | 13,33 | 0,32  | 0,66  | 0,36  | 0,50  | 0,7483777 | 0,00690052 | 0,11533745 | 0,00726863 | lamin A/C                                                                                             |
| <i>CLCF1</i>     | 7,68  | 5,99  | 0,45  | 1,58  | 0,33  | 0,50  | 0,7476439 | 0,00068055 | 0,2098929  | 0,01512167 | cardiotrophin like cytokine factor 1                                                                  |
| <i>E2F8</i>      | 9,22  | 7,53  | -0,25 | -1,70 | -0,34 | -0,52 | 0,9997134 | 0,00841078 | 0,3154619  | 0,0346684  | E2F transcription factor 8                                                                            |
| <i>BIRC5</i>     | 15,45 | 15,02 | -0,26 | -0,79 | -0,24 | -0,52 | 0,888547  | 0,0034463  | 0,2654518  | 0,00816702 | baculoviral IAP repeat containing 5<br>cyclin and CBS domain divalent metal cation transport mediator |
| <i>CNNM3</i>     | 10,76 | 9,27  | -0,23 | -0,65 | -0,27 | -0,52 | 0,9997134 | 0,044164   | 0,33391256 | 0,01955089 | 3                                                                                                     |
| <i>DUSP6</i>     | 11,19 | 8,68  | 0,88  | 1,91  | -0,34 | -0,53 | 0,4610304 | 0,00078647 | 0,2779374  | 0,02541825 | dual specificity phosphatase 6                                                                        |
| <i>ACBD7</i>     | 10,67 | 7,13  | -0,42 | -1,00 | -0,29 | -0,56 | 0,9351359 | 0,01558759 | 0,1766067  | 0,00597753 | acyl-CoA binding domain containing 7                                                                  |
| <i>NUF2</i>      | 11,85 | 10,73 | -0,22 | -1,15 | -0,49 | -0,57 | 0,9577383 | 0,00069232 | 0,0401191  | 0,00479245 | NUF2 component of NDC80 kinetochore complex                                                           |
| <i>MCCC1</i>     | 12,81 | 10,32 | -0,28 | -0,72 | -0,26 | -0,58 | 0,8753346 | 0,00748987 | 0,34469874 | 0,01416034 | methylcrotonoyl-CoA carboxylase 1                                                                     |
| <i>RCOR3</i>     | 7,62  | 8,13  | -0,20 | -0,51 | -0,34 | -0,59 | 0,9997134 | 0,03781547 | 0,2770227  | 0,01877739 | REST corepressor 3                                                                                    |
| <i>FGD6</i>      | 7,78  | 7,32  | 0,25  | 0,58  | -0,43 | -0,66 | 0,9457244 | 0,02259114 | 0,14940039 | 0,00799108 | FYVE, RhoGEF and PH domain containing 6                                                               |
| <i>METTL7A</i>   | 9,41  | 12,45 | -0,41 | -2,15 | -0,36 | -0,66 | 0,6507079 | 0,00011212 | 0,18959492 | 0,00696542 | methyltransferase like 7A                                                                             |
| <i>FBXO4</i>     | 8,66  | 6,55  | -0,39 | -1,24 | -0,31 | -0,68 | 0,945262  | 0,00489873 | 0,29153408 | 0,00989026 | F-box protein 4                                                                                       |
| <i>VSNL1</i>     | 11,64 | 7,34  | -0,26 | -0,94 | -0,44 | -0,70 | 0,9869505 | 0,00497206 | 0,31306989 | 0,03156015 | visinin like 1                                                                                        |
| <i>LOC644656</i> | 9,06  | 7,47  | -0,32 | -0,93 | -0,54 | -0,70 | 0,9997134 | 0,03092034 | 0,10920729 | 0,00866941 | uncharacterized LOC644656                                                                             |
| <i>MFAP4</i>     | 5,85  | 14,83 | -0,28 | -0,59 | -0,36 | -0,73 | 0,888547  | 0,01965087 | 0,13369348 | 0,00284995 | microfibril associated protein 4                                                                      |
| <i>PRSS36</i>    | 11,42 | 7,70  | -0,52 | -0,94 | -0,70 | -0,73 | 0,4091634 | 0,0014083  | 0,11191704 | 0,01817274 | serine protease 36                                                                                    |
| <i>CDCA3</i>     | 11,15 | 10,48 | -0,21 | -1,18 | -0,54 | -0,74 | 0,9997134 | 0,00093548 | 0,1062807  | 0,00720604 | cell division cycle associated 3                                                                      |
| <i>FOXN4</i>     | 5,71  | 10,29 | -0,32 | -0,80 | -0,48 | -0,81 | 0,875209  | 0,00799835 | 0,25847407 | 0,01735726 | forkhead box N4                                                                                       |
| <i>CDKN2C</i>    | 11,96 | 12,01 | -0,57 | -1,61 | -0,53 | -0,81 | 0,968072  | 0,01233867 | 0,05225786 | 0,00224508 | cyclin dependent kinase inhibitor 2C                                                                  |
| <i>GLCCI1</i>    | 9,64  | 10,56 | 0,59  | 2,16  | -0,77 | -0,86 | 0,9997134 | 0,02324292 | 0,01122615 | 0,00146799 | glucocorticoid induced 1                                                                              |
| <i>PDGFRL</i>    | 7,66  | 7,46  | -0,31 | -1,05 | -0,38 | -0,88 | 0,7862474 | 0,00104556 | 0,37905536 | 0,01572915 | platelet derived growth factor receptor like                                                          |
| <i>HLF</i>       | 12,84 | 6,64  | -0,23 | -1,23 | -0,55 | -1,06 | 0,9997134 | 0,00415299 | 0,45915579 | 0,04526024 | HLF transcription factor, PAR bZIP family member                                                      |
