# Supplementary material for: Is Cadmium Toxicity Tissue-Specific? Toxicogenomics Studies Reveal Common and Specific Pathways in Pulmonary, Hepatic, and Neuronal Cell Models
Source: MDPI journal article supplement (doi:10.3390/ijms23031768), 2022-02-04
Supplement: s1 [file s1]

**Table S2.** Comparison of regulated genes (up and down) in common in pulmonary (A549), and neuronal (SH-SY5Y) cell models exposed to Cd for 24 hours.

|                   | AveExpr.<br>A549 | AveExpr.<br>SHSY5Y | logFC.10.<br>A549 | logFC.20.<br>A549 | logFC.10.<br>.SHSY5Y | logFC.20.<br>SHSY5Y | adj.P.Val.10<br>.A549 | adj.P.Val.20.<br>A549 | adj.P.Val.10.S<br>HSY5Y | adj.P.Val.20.<br>SHSY5Y | Description                                                                                     |
|-------------------|------------------|--------------------|-------------------|-------------------|----------------------|---------------------|-----------------------|-----------------------|-------------------------|-------------------------|-------------------------------------------------------------------------------------------------|
| <i>ACTA2</i>      | 8,6245           | 7,96338            | -0,6403           | -0,8322           | 1,19265              | 1,533856            | 0,19327779            | 0,0327109             | 0,017505413             | 0,00127934              | actin alpha 2, smooth muscle                                                                    |
| <i>ACTL8</i>      | 8,34331          | 6,30257            | 1,316438          | 1,56929           | 0,66143              | 1,099943            | 0,00636561            | 0,00095894            | 0,371753983             | 0,03907408              | actin like 8                                                                                    |
| <i>ADGRG1</i>     | 14,1145          | 8,98864            | 0,434868          | 0,51455           | 1,27846              | 2,482166            | 0,14198852            | 0,02697446            | 0,163404333             | 0,0048983               | adhesion G protein-coupled receptor G1                                                          |
| <i>AKAP8L</i>     | 10,8004          | 10,7869            | 0,375127          | 0,59423           | 0,3186               | 0,523067            | 0,27682879            | 0,03647453            | 0,167276212             | 0,00816702              | A-kinase anchoring protein 8 like                                                               |
| <i>AMN1</i>       | 8,11753          | 6,74308            | 0,217663          | 0,609             | 0,30403              | 0,613949            | 0,51093866            | 0,04290565            | 0,238487986             | 0,00816702              | antagonist of mitotic exit network 1 homolog<br>ADP ribosylation factor like GTPase 14 effector |
| <i>ARL14EPL</i>   | 5,82465          | 5,80456            | 0,440862          | 1,26296           | 0,73399              | 1,861029            | 0,48940645            | 0,0327109             | 0,316074737             | 0,00743015              | protein like<br>aryl hydrocarbon receptor nuclear translocator                                  |
| <i>ARNTL2</i>     | 9,43933          | 6,93523            | 0,350482          | 0,675             | 0,5011               | 0,571367            | 0,34625746            | 0,04024127            | 0,058196219             | 0,00671395              | like 2                                                                                          |
| <i>ATF3</i>       | 8,59937          | 8,50103            | 0,493973          | 0,69405           | 0,78697              | 1,481817            | 0,19340061            | 0,02523982            | 0,109569889             | 0,00279908              | activating transcription factor 3                                                               |
| <i>ATP6VOA1</i>   | 13,97            | 13,491             | 0,40627           | 0,64474           | 0,37062              | 0,51116             | 0,26096821            | 0,0327109             | 0,094941587             | 0,00628738              | ATPase H+ transporting V0 subunit a1                                                            |
| <i>B3GALT4</i>    | 8,18504          | 7,92608            | -0,70317          | -1,1176           | -0,3003              | -0,69343            | 0,13271469            | 0,00616978            | 0,477495378             | 0,03083865              | beta-1,3-galactosyltransferase 4                                                                |
| <i>BAG3</i>       | 10,9889          | 8,22647            | 0,589476          | 0,70954           | 1,14098              | 2,51143             | 0,17657679            | 0,03557994            | 0,270457439             | 0,00816532              | BAG cochaperone 3                                                                               |
| <i>BMPR1B-DT</i>  | 7,11984          | 6,60847            | -0,37172          | -0,7419           | -0,4022              | -0,68715            | 0,32056332            | 0,02829988            | 0,257357275             | 0,01639477              | BMPR1B divergent transcript                                                                     |
| <i>BSPRY</i>      | 6,54611          | 6,56362            | 0,363272          | 0,81137           | 0,83502              | 1,196363            | 0,40185315            | 0,03977864            | 0,039144302             | 0,00212547              | B-box and SPRY domain containing                                                                |
| <i>C1GALT1C1L</i> | 7,67085          | 8,80966            | -0,74093          | -0,7936           | -0,3819              | -0,79115            | 0,0994574             | 0,02511396            | 0,257357275             | 0,00888423              | C1GALT1 specific chaperone 1 like                                                               |
| <i>CCDC114</i>    | 6,86796          | 6,28499            | 0,993336          | 0,98287           | 0,39254              | 0,564549            | 0,11948799            | 0,0389095             | 0,298729724             | 0,03733401              | coiled-coil domain containing 114                                                               |
| <i>CCDC172</i>    | 10,1805          | 8,63832            | 1,171962          | 1,59039           | 1,67129              | 2,058665            | 0,0012553             | 8,14E-05              | 0,038765528             | 0,0036294               | coiled-coil domain containing 172                                                               |
| <i>CD300H</i>     | 8,83723          | 7,0801             | 3,284636          | 3,44524           | 1,66751              | 1,817258            | 2,79E-06              | 1,77E-06              | 0,040073161             | 0,00546503              | CD300H molecule (gene/pseudogene)                                                               |
| <i>CD68</i>       | 10,6601          | 7,58488            | 0,499695          | 0,81381           | 1,28649              | 1,903889            | 0,27902454            | 0,03500513            | 0,001055715             | 3,38E-05                | CD68 molecule                                                                                   |
| <i>CDK5RAP1</i>   | 10,5122          | 9,13463            | -0,24066          | -0,5437           | -0,4158              | -0,62399            | 0,3407205             | 0,02199979            | 0,172248401             | 0,01186799              | CDK5 regulatory subunit associated protein 1<br>cytochrome P450 family 2 subfamily F member     |
| <i>CYP2F1</i>     | 6,0331           | 5,84622            | 0,34569           | 0,87363           | 0,6561               | 0,840717            | 0,36636851            | 0,01890267            | 0,163404333             | 0,01733298              | 1                                                                                               |
| <i>DDIT3</i>      | 9,19152          | 9,38797            | 1,332211          | 1,91367           | 1,21572              | 2,455282            | 0,07021702            | 0,00383437            | 0,162584888             | 0,00424609              | DNA damage inducible transcript 3                                                               |
| <i>DDX46</i>      | 10,0085          | 8,59022            | -0,41267          | -0,6033           | -0,5542              | -0,69963            | 0,19340061            | 0,02217473            | 0,103197099             | 0,00894825              | DEAD-box helicase 46                                                                            |
| <i>DEDD2</i>      | 12,3234          | 10,7917            | 0,352989          | 0,80418           | 0,47048              | 1,296863            | 0,26910382            | 0,00778299            | 0,524182085             | 0,02560877              | death effector domain containing 2                                                              |

|                 |         |         |          |         |         |          |            |            |             |            |                                                        |
|-----------------|---------|---------|----------|---------|---------|----------|------------|------------|-------------|------------|--------------------------------------------------------|
| <i>DNAJB1</i>   | 12,5639 | 11,963  | 0,561486 | 0,99734 | 1,56312 | 3,155849 | 0,14206236 | 0,003901   | 0,167276212 | 0,00439305 | DnaJ heat shock protein family (Hsp40) member B1       |
| <i>DNAJB5</i>   | 8,23636 | 10,008  | 0,352096 | 0,66171 | 0,25406 | 0,575358 | 0,3111757  | 0,03259979 | 0,39593224  | 0,01823015 | DnaJ heat shock protein family (Hsp40) member B5       |
| <i>EDN2</i>     | 11,1651 | 6,51213 | 0,674823 | 0,91235 | 1,39508 | 1,938042 | 0,10425032 | 0,01032244 | 0,000904855 | 3,84E-05   | endothelin 2                                           |
| <i>FABP6</i>    | 7,24995 | 7,03053 | 0,394372 | 0,56824 | 0,84057 | 1,067104 | 0,25506284 | 0,04290565 | 0,090123014 | 0,00743705 | fatty acid binding protein 6                           |
| <i>FAM189A1</i> | 7,09784 | 6,48904 | 0,514335 | 0,90614 | 0,46079 | 0,724709 | 0,27305481 | 0,02509487 | 0,348809723 | 0,03996744 | family with sequence similarity 189 member A1          |
| <i>FAM189A2</i> | 6,22495 | 5,59012 | 0,918262 | 0,90054 | 0,56602 | 0,775899 | 0,03140825 | 0,01262777 | 0,13764021  | 0,01068263 | family with sequence similarity 189 member A2          |
| <i>FAM241B</i>  | 12,1121 | 11,7745 | 0,394992 | 0,65327 | 0,4647  | 1,083187 | 0,27927499 | 0,03370483 | 0,49658794  | 0,03516864 | family with sequence similarity 241 member B           |
| <i>FICD</i>     | 9,43182 | 8,73941 | 0,359093 | 0,76054 | 0,76181 | 2,041396 | 0,19798177 | 0,00394383 | 0,444240071 | 0,01567391 | FIC domain protein adenylyltransferase                 |
| <i>FKBP4</i>    | 11,8773 | 10,8975 | 0,515058 | 0,61783 | 0,51915 | 0,792933 | 0,16911639 | 0,03238816 | 0,095562778 | 0,00479245 | FKBP prolyl isomerase 4                                |
| <i>FOSB</i>     | 7,77225 | 7,3099  | 1,662022 | 2,66553 | 1,72529 | 3,417194 | 0,00239558 | 4,57E-05   | 0,137938689 | 0,0035287  | FosB proto-oncogene, AP-1 transcription factor subunit |
| <i>GADD45A</i>  | 11,4389 | 10,8451 | 0,629285 | 0,82954 | 1,09979 | 1,772706 | 0,07354783 | 0,00662417 | 0,011637009 | 0,00036423 | growth arrest and DNA damage inducible alpha           |
| <i>GBAP1</i>    | 10,0248 | 10,156  | 0,532472 | 0,90422 | 0,58083 | 1,087284 | 0,12146093 | 0,003423   | 0,294655979 | 0,01646497 | glucosylceramidase beta pseudogene 1                   |
| <i>GBP5</i>     | 6,03215 | 6,12497 | 0,568276 | 1,0082  | 0,40709 | 0,646604 | 0,25729389 | 0,02190384 | 0,3556904   | 0,04024728 | guanylate binding protein 5                            |
| <i>GCA7</i>     | 8,15205 | 9,98519 | 0,692826 | 0,76481 | 0,44343 | 0,557113 | 0,05535032 | 0,01218963 | 0,153987455 | 0,01684129 | glycine C-acetyltransferase                            |
| <i>GCNA</i>     | 7,55521 | 8,15061 | 0,871353 | 1,01006 | 1,81041 | 3,64563  | 0,14198852 | 0,02888374 | 0,205626421 | 0,00623591 | germ cell nuclear acidic peptidase                     |
| <i>GEM</i>      | 8,76746 | 9,37942 | 0,417902 | 1,10301 | 0,40662 | 1,229088 | 0,35886734 | 0,01424272 | 0,549638774 | 0,02263003 | GTP binding protein overexpressed in skeletal muscle   |
| <i>GOT1</i>     | 12,88   | 11,0309 | 0,456389 | 0,66533 | 0,2196  | 0,614082 | 0,17182001 | 0,01648827 | 0,401219716 | 0,00989026 | glutamic-oxaloacetic transaminase 1                    |
| <i>GPR160</i>   | 8,66769 | 6,84358 | 0,803239 | 1,03627 | 0,51389 | 0,517258 | 0,20073095 | 0,03876071 | 0,114006038 | 0,02079916 | G protein-coupled receptor 160                         |
| <i>H19</i>      | 8,52441 | 9,09612 | -1,10998 | -1,3837 | 0,77467 | 0,802156 | 0,08158214 | 0,01142859 | 0,169465261 | 0,03447285 | H19 imprinted maternally expressed transcript          |
| <i>HMOX1</i>    | 16,936  | 14,0676 | 1,395134 | 1,56228 | 5,27027 | 6,810351 | 0,00369027 | 0,00086699 | 0,012136562 | 0,00096511 | heme oxygenase 1                                       |
| <i>HRG</i>      | 6,40505 | 5,92607 | 0,373837 | 0,91355 | 0,45738 | 1,196013 | 0,34625746 | 0,01728295 | 0,436773546 | 0,01572915 | histidine rich glycoprotein                            |
| <i>HSD17B6</i>  | 6,91319 | 7,96387 | 0,804972 | 1,09873 | 0,64459 | 0,912761 | 0,19040613 | 0,02659639 | 0,052427798 | 0,00314237 | hydroxysteroid 17-beta dehydrogenase 6                 |
| <i>HSPA1B</i>   | 14,2824 | 13,9286 | 1,432675 | 2,04958 | 2,14069 | 3,728357 | 0,0072321  | 0,0003531  | 0,115337447 | 0,00395575 | heat shock protein family A (Hsp70) member 1B          |

|                    |         |         |          |         |         |          |            |            |             |            |                                                                         |
|--------------------|---------|---------|----------|---------|---------|----------|------------|------------|-------------|------------|-------------------------------------------------------------------------|
| <i>HSPA1L</i>      | 7,11168 | 7,51968 | 0,616348 | 1,04176 | 0,63246 | 1,470484 | 0,10425032 | 0,00288024 | 0,452880231 | 0,02533906 | heat shock protein family A (Hsp70) member 1 like                       |
| <i>HSPH1</i>       | 13,8537 | 13,0183 | 0,515464 | 0,6959  | 0,35189 | 1,177627 | 0,20394935 | 0,03493424 | 0,652015284 | 0,03489515 | heat shock protein family H (Hsp110) member 1                           |
| <i>JMJD1C-AS1</i>  | 8,04513 | 8,93591 | -0,31145 | -0,6677 | -0,3204 | -0,58366 | 0,26683194 | 0,01054308 | 0,362900956 | 0,02824613 | JMJD1C antisense RNA 1                                                  |
| <i>KIF25-AS1</i>   | 6,95035 | 6,53903 | -0,22764 | -0,5266 | -0,2194 | -0,54643 | 0,42212218 | 0,04085257 | 0,508864894 | 0,03130969 | KIF25 antisense RNA 1                                                   |
| <i>KLHDC8A</i>     | 6,94421 | 6,33374 | 0,496314 | 0,78406 | 0,73272 | 1,396348 | 0,26683194 | 0,03500513 | 0,02722859  | 0,00041057 | kelch domain containing 8A                                              |
| <i>KLHL18</i>      | 10,0934 | 10,0279 | 0,499803 | 0,75468 | 0,26659 | 0,780351 | 0,21847955 | 0,02858277 | 0,54853806  | 0,02465242 | kelch like family member 18                                             |
| <i>LAMA5-AS1</i>   | 10,7471 | 9,96561 | 0,378001 | 0,88864 | 0,27724 | 0,526126 | 0,42212218 | 0,0389095  | 0,447759564 | 0,04431753 | LAMA5 antisense RNA 1                                                   |
| <i>LINC00624</i>   | 5,94153 | 6,62562 | 0,74056  | 1,21049 | 0,94273 | 2,284893 | 0,01583387 | 0,00033115 | 0,283839552 | 0,00682952 | long intergenic non-protein coding RNA 624                              |
| <i>LINC01201</i>   | 8,42193 | 6,58252 | -0,86775 | -1,0368 | -0,2454 | -0,6043  | 0,00855707 | 0,00130249 | 0,42373956  | 0,01734876 | long intergenic non-protein coding RNA 1201                             |
| <i>LINC01511</i>   | 7,42213 | 6,16816 | 1,283418 | 2,01637 | 0,64009 | 1,382401 | 0,00239558 | 5,36E-05   | 0,386907788 | 0,01979143 | long intergenic non-protein coding RNA 1511                             |
| <i>LINC01963</i>   | 9,50639 | 9,58803 | -0,73446 | -0,9535 | -0,4929 | -0,63174 | 0,2184559  | 0,0451969  | 0,114279552 | 0,00989026 | long intergenic non-protein coding RNA 1963                             |
| <i>LINC02543</i>   | 7,97671 | 5,87213 | 0,682324 | 0,83235 | 0,48725 | 0,598588 | 0,08158214 | 0,01218963 | 0,157244939 | 0,01849187 | long intergenic non-protein coding RNA 2543                             |
| <i>LOC10050669</i> | 8,40627 | 7,42059 | 0,340723 | 0,58194 | 0,55506 | 0,863136 | 0,27784371 | 0,02888374 | 0,037977038 | 0,00125484 | uncharacterized LOC100506691                                            |
| <i>LOC10537036</i> | 6,48639 | 5,51211 | 0,532906 | 1,28997 | 0,51807 | 0,980534 | 0,31451992 | 0,01249787 | 0,344499038 | 0,0225721  | uncharacterized LOC105370364                                            |
| <i>LOC10537210</i> | 10,8825 | 9,16343 | 3,293948 | 3,727   | 2,15334 | 2,442802 | 1,42E-05   | 3,91E-06   | 0,004171688 | 0,00055863 | uncharacterized LOC105372100                                            |
| <i>LOC10798689</i> | 7,1127  | 7,52059 | 0,626547 | 0,6199  | 0,63965 | 0,651574 | 0,14206236 | 0,04770881 | 0,03789791  | 0,00601793 | uncharacterized LOC107986898                                            |
| <i>LY96</i>        | 6,40417 | 5,89721 | 0,876211 | 1,40444 | 0,73746 | 1,870592 | 0,22573133 | 0,02478063 | 0,338484603 | 0,00857921 | lymphocyte antigen 96<br>microtubule associated protein 1 light chain 3 |
| <i>MAP1LC3B</i>    | 10,8124 | 10,5403 | 0,513068 | 1,07653 | 0,3646  | 0,857735 | 0,28916071 | 0,01693596 | 0,396245276 | 0,01639477 | beta<br>membrane bound O-acyltransferase domain                         |
| <i>MBOAT4</i>      | 5,74957 | 5,78    | 0,313649 | 0,54349 | 0,67928 | 0,834567 | 0,28003399 | 0,03080527 | 0,118866728 | 0,01234331 | containing 4                                                            |
| <i>MEIG1</i>       | 7,40105 | 7,24896 | -0,20018 | -0,5606 | -0,4918 | -0,62612 | 0,45272752 | 0,02788365 | 0,098663737 | 0,00838222 | meiosis/spermiogenesis associated 1                                     |
| <i>MRM1</i>        | 10,3734 | 8,23593 | -0,55189 | -0,7578 | -0,3425 | -0,734   | 0,19151099 | 0,02659639 | 0,42747929  | 0,02698231 | mitochondrial rRNA methyltransferase 1                                  |
| <i>MSRA</i>        | 11,0421 | 9,88812 | -0,36119 | -0,5733 | -0,4368 | -0,56627 | 0,28916071 | 0,04349884 | 0,150408479 | 0,01459939 | methionine sulfoxide reductase A                                        |
| <i>MSX1</i>        | 8,55649 | 5,91761 | 0,55747  | 0,79818 | 0,68624 | 1,49281  | 0,17396204 | 0,01773096 | 0,285003273 | 0,00950812 | msh homeobox 1                                                          |
| <i>MT1HL1</i>      | 16,8526 | 15,7539 | 3,64044  | 3,95617 | 6,42206 | 6,597955 | 8,46E-07   | 5,08E-07   | 1,33E-08    | 5,29E-09   | metallothionein 1H like 1                                               |
| <i>MYOM2</i>       | 8,54803 | 7,21537 | 0,347461 | 0,71716 | 0,33624 | 0,903776 | 0,37816308 | 0,04290565 | 0,545987254 | 0,03142621 | myomesin 2                                                              |

|                |         |         |          |         |         |          |            |            |             |            |                                                                                            |
|----------------|---------|---------|----------|---------|---------|----------|------------|------------|-------------|------------|--------------------------------------------------------------------------------------------|
| <i>NEK3</i>    | 7,93439 | 8,10209 | -0,8621  | -1,327  | -0,5926 | -1,14065 | 0,04244146 | 0,00130249 | 0,352367679 | 0,0225721  | NIMA related kinase 3                                                                      |
| <i>NEURL3</i>  | 8,29136 | 5,6234  | 0,9179   | 1,16732 | 0,53927 | 1,246865 | 0,19493267 | 0,03730155 | 0,295171066 | 0,00842251 | neuralized E3 ubiquitin protein ligase 3<br>olfactory receptor family 8 subfamily B member |
| <i>OR8B8</i>   | 9,38764 | 8,36667 | 0,343522 | 0,65173 | 0,67576 | 1,082922 | 0,34916665 | 0,04323215 | 0,214181857 | 0,01359952 | 8                                                                                          |
| <i>PDE7B</i>   | 7,88554 | 8,00562 | -0,36217 | -0,6762 | -0,5764 | -0,83878 | 0,32994278 | 0,03876071 | 0,235794674 | 0,02205452 | phosphodiesterase 7B                                                                       |
| <i>PEG13</i>   | 6,38706 | 7,17891 | 0,542358 | 0,71721 | -0,2843 | -0,63572 | 0,19327779 | 0,03086969 | 0,507081398 | 0,04203412 | paternally expressed 13                                                                    |
| <i>PGBD2</i>   | 8,82297 | 8,75898 | 0,48733  | 0,51302 | 0,34944 | 0,563817 | 0,12146093 | 0,03270792 | 0,163404333 | 0,00840142 | piggyBac transposable element derived 2                                                    |
| <i>PLA2G4C</i> | 8,89293 | 7,14849 | 1,723427 | 2,11261 | 1,02122 | 1,628894 | 0,0011846  | 0,00015752 | 0,091646423 | 0,00385192 | phospholipase A2 group IVC                                                                 |
| <i>PLAC1</i>   | 7,32106 | 5,85324 | 0,79429  | 1,19364 | 0,43065 | 0,814948 | 0,023821   | 0,00082583 | 0,290697089 | 0,01567391 | placenta enriched 1                                                                        |
| <i>PLEK2</i>   | 10,283  | 6,23331 | 0,341002 | 0,65296 | 0,85349 | 1,387608 | 0,30448382 | 0,02888374 | 0,037977038 | 0,00102735 | pleckstrin 2                                                                               |
| <i>PLTP</i>    | 7,77242 | 11,2778 | 0,567165 | 1,27758 | 0,5899  | 0,782133 | 0,3117212  | 0,01700195 | 0,056358013 | 0,00413165 | phospholipid transfer protein                                                              |
| <i>PRRG2</i>   | 6,92276 | 6,63223 | 0,282735 | 0,63819 | 0,70695 | 1,4769   | 0,41909423 | 0,04290565 | 0,391518413 | 0,02303087 | proline rich and Gla domain 2                                                              |
| <i>RASIP1</i>  | 8,31169 | 8,73666 | 0,388496 | 0,72349 | 0,40087 | 0,810866 | 0,35862389 | 0,04848818 | 0,166758566 | 0,00434937 | Ras interacting protein 1                                                                  |
| <i>RCOR2</i>   | 9,03866 | 12,4427 | -0,55156 | -0,7664 | -0,2955 | -0,7308  | 0,24471985 | 0,04373342 | 0,233075826 | 0,0041987  | REST corepressor 2                                                                         |
| <i>RFPL2</i>   | 6,46782 | 5,83778 | 0,750557 | 1,5002  | 0,3902  | 1,107013 | 0,17396204 | 0,00312557 | 0,586731038 | 0,03552943 | ret finger protein like 2                                                                  |
| <i>RIPK4</i>   | 8,68328 | 5,99103 | 0,394892 | 0,52256 | 0,34721 | 0,593555 | 0,19493267 | 0,0327109  | 0,229412531 | 0,0127569  | receptor interacting serine/threonine kinase 4                                             |
| <i>RTL5</i>    | 9,4717  | 12,0735 | -0,40916 | -0,7783 | -0,3967 | -0,82435 | 0,18627714 | 0,00538389 | 0,313275469 | 0,01359952 | retrotransposon Gag like 5                                                                 |
| <i>RTL8B</i>   | 8,1813  | 9,73043 | -0,26654 | -0,5388 | -0,2426 | -0,54044 | 0,37571437 | 0,04368007 | 0,274637232 | 0,00816532 | retrotransposon Gag like 8B                                                                |
| <i>SESN2</i>   | 8,12369 | 7,77349 | 0,372351 | 0,62817 | 0,67137 | 1,484973 | 0,26085751 | 0,02696998 | 0,312934847 | 0,01127408 | sestrin 2                                                                                  |
| <i>SLC30A1</i> | 11,8598 | 10,121  | 1,57019  | 1,83258 | 2,12894 | 2,263922 | 7,08E-05   | 1,66E-05   | 3,90E-05    | 1,20E-05   | solute carrier family 30 member 1                                                          |
| <i>SLC30A2</i> | 8,28121 | 8,12345 | 2,832107 | 3,0745  | 3,1799  | 3,677543 | 3,21E-05   | 1,48E-05   | 0,009270457 | 0,00101022 | solute carrier family 30 member 2                                                          |
| <i>SMAD7</i>   | 9,97619 | 9,76213 | 0,439066 | 0,72723 | 0,21913 | 0,603817 | 0,2339901  | 0,02326297 | 0,332408142 | 0,00651257 | SMAD family member 7                                                                       |
| <i>SOX8</i>    | 8,07797 | 6,54665 | 0,399659 | 1,01575 | 0,57146 | 1,545417 | 0,35586249 | 0,01662479 | 0,388378815 | 0,00989026 | SRY-box transcription factor 8                                                             |
| <i>SSUH2</i>   | 7,74271 | 9,45476 | 0,552772 | 0,83817 | 0,90773 | 1,365486 | 0,27784371 | 0,04290565 | 0,014377461 | 0,00060344 | ssu-2 homolog                                                                              |
| <i>SUSD5</i>   | 6,43947 | 5,98393 | 1,075821 | 1,25602 | 0,45629 | 0,687439 | 0,17396204 | 0,03741622 | 0,263821374 | 0,02533906 | sushi domain containing 5                                                                  |
| <i>TEX19</i>   | 8,41193 | 9,90876 | 1,356742 | 2,03956 | 2,45944 | 3,700725 | 0,00847506 | 0,00031577 | 0,112730967 | 0,00601793 | testis expressed 19                                                                        |
| <i>TMEM41B</i> | 11,0372 | 9,79041 | 0,466982 | 0,71195 | 0,32287 | 0,868477 | 0,21136171 | 0,02507731 | 0,458642184 | 0,01673291 | transmembrane protein 41B                                                                  |
| <i>TMEM79</i>  | 10,0488 | 9,51774 | 0,566431 | 0,898   | 0,27862 | 0,884074 | 0,0793015  | 0,00280312 | 0,640696317 | 0,03681392 | transmembrane protein 79                                                                   |
| <i>TNFRSF8</i> | 7,17036 | 6,74922 | 0,680781 | 1,05958 | 0,71374 | 1,421483 | 0,17396204 | 0,01262777 | 0,355933631 | 0,02061803 | TNF receptor superfamily member 8                                                          |
| <i>TTC9B</i>   | 7,10987 | 11,9906 | 0,954766 | 1,6986  | 1,35645 | 2,106556 | 0,04892893 | 0,00059438 | 0,101553983 | 0,00479771 | tetratricopeptide repeat domain 9B                                                         |

|                |         |         |          |         |         |          |            |            |             |            |                                                                  |
|----------------|---------|---------|----------|---------|---------|----------|------------|------------|-------------|------------|------------------------------------------------------------------|
| <i>UBXN8</i>   | 10,2325 | 9,61775 | 0,549141 | 0,79187 | 0,2655  | 0,603441 | 0,12146093 | 0,0086919  | 0,477637532 | 0,0322335  | UBX domain protein 8<br>ubiquinol-cytochrome c reductase complex |
| <i>UQCC3</i>   | 14,924  | 12,7659 | -0,28208 | -0,6259 | -0,5515 | -0,93386 | 0,36717409 | 0,03128412 | 0,153754174 | 0,00667727 | assembly factor 3                                                |
| <i>ZFAND2A</i> | 11,6637 | 11,2703 | 0,694674 | 1,20636 | 2,16884 | 4,06832  | 0,1037185  | 0,00233856 | 0,132213575 | 0,00383099 | zinc finger AN1-type containing 2A                               |
| <i>ZNF143</i>  | 9,76289 | 8,70486 | 0,440073 | 0,61171 | 0,29567 | 0,689074 | 0,25161944 | 0,04590229 | 0,365175532 | 0,0136595  | zinc finger protein 143                                          |
| <i>ZNF165</i>  | 9,82852 | 8,88812 | 1,669699 | 2,62201 | 1,12778 | 2,088581 | 0,00012578 | 3,15E-06   | 0,281215563 | 0,01571098 | zinc finger protein 165                                          |
| <i>ZNF350</i>  | 9,00342 | 8,16847 | -0,23672 | -0,6127 | -0,5139 | -0,71859 | 0,37321231 | 0,01873425 | 0,082104549 | 0,0052742  | zinc finger protein 350                                          |

---
