# Supplementary material for: Is Cadmium Toxicity Tissue-Specific? Toxicogenomics Studies Reveal Common and Specific Pathways in Pulmonary, Hepatic, and Neuronal Cell Models
Source: MDPI journal article supplement (doi:10.3390/ijms23031768), 2022-02-04
Supplement: s1 [file s1]

**Table S3.** Comparison of regulated genes (up and down) in common in pulmonary (A549), and hepatic (HepG2) cell models exposed to Cd for 24 hours.

| Gene             | AveExpr. HEPG2 | AveExpr. A549 | logFC.2. HEPG2 | logFC.10. HEPG2 | logFC.10. A549 | logFC.20. A549 | adj.P.Val.2. HEPG2 | adj.P.Val.10. .HEPG2 | adj.P.Val.10. .A549 | adj.P.Val.20. A549 | Description                                         |
|------------------|----------------|---------------|----------------|-----------------|----------------|----------------|--------------------|----------------------|---------------------|--------------------|-----------------------------------------------------|
| <i>SERPINE1</i>  | 9,06           | 9,02          | 0,61           | 2,77            | 0,89           | 1,26           | 0,9884185          | 0,00212986           | 0,17001949          | 0,01773096         | serpin family E member 1                            |
| <i>METRNL</i>    | 10,95          | 8,45          | 0,74           | 2,46            | 0,66           | 0,73           | 0,6308422          | 0,00046514           | 0,03312847          | 0,00721744         | meteorin like, glial cell differentiation regulator |
| <i>RND3</i>      | 7,44           | 11,08         | 0,22           | 2,32            | 0,40           | 0,68           | 0,9997134          | 0,01326343           | 0,27927499          | 0,03247194         | Rho family GTPase 3                                 |
| <i>TGM2</i>      | 10,52          | 10,80         | 0,73           | 2,19            | 0,71           | 1,00           | 0,7483777          | 0,00133462           | 0,1350925           | 0,01218963         | transglutaminase 2                                  |
| <i>PSG6</i>      | 6,12           | 5,91          | 0,36           | 2,00            | 0,46           | 0,79           | 0,9997134          | 0,00288259           | 0,3111757           | 0,04324383         | pregnancy specific beta-1-glycoprotein 6            |
| <i>KRT15</i>     | 9,91           | 11,26         | 0,39           | 1,82            | 0,53           | 0,91           | 0,7476439          | 0,00027361           | 0,21388124          | 0,01709219         | keratin 15                                          |
| <i>MPZL3</i>     | 11,40          | 6,47          | 0,45           | 1,75            | 0,32           | 0,56           | 0,9997134          | 0,02058221           | 0,27927499          | 0,02767496         | myelin protein zero like 3                          |
| <i>IL23A</i>     | 8,10           | 7,77          | 0,27           | 1,69            | 0,70           | 1,06           | 0,9997134          | 0,00167105           | 0,07657072          | 0,00313627         | interleukin 23 subunit alpha                        |
| <i>MCL1</i>      | 11,04          | 10,41         | 0,49           | 1,36            | 0,55           | 0,89           | 0,6623391          | 0,00113425           | 0,21683076          | 0,0205932          | MCL1 apoptosis regulator, BCL2 family member        |
| <i>VGF</i>       | 7,14           | 11,22         | 0,22           | 1,30            | 0,36           | 0,86           | 0,9997134          | 0,00411487           | 0,29872767          | 0,01086282         | VGF nerve growth factor inducible                   |
| <i>ZNF556</i>    | 9,94           | 5,79          | 0,38           | 1,19            | 0,51           | 0,95           | 0,9303207          | 0,0047146            | 0,28478006          | 0,02511396         | zinc finger protein 556                             |
| <i>TM4SF19</i>   | 5,65           | 8,73          | 0,48           | 1,11            | 0,73           | 1,16           | 0,7862474          | 0,00501327           | 0,08448537          | 0,00304855         | transmembrane 4 L six family member 19              |
| <i>FAM135A</i>   | 8,00           | 7,51          | 0,40           | 0,98            | 0,37           | 0,54           | 0,7898033          | 0,00403897           | 0,26141194          | 0,04331206         | family with sequence similarity 135 member A        |
| <i>ITPR1PL2</i>  | 10,58          | 11,51         | 0,27           | 0,94            | -0,42          | -0,53          | 0,9296766          | 0,00288259           | 0,14256381          | 0,02217473         | ITPRIP like 2                                       |
| <i>PSPN</i>      | 7,67           | 9,23          | 0,43           | 0,94            | 0,56           | 0,59           | 0,7431268          | 0,00460293           | 0,14256381          | 0,03971511         | persephin                                           |
| <i>IL32</i>      | 12,37          | 7,71          | 0,30           | 0,92            | 0,25           | 0,76           | 0,9997134          | 0,01881695           | 0,5579669           | 0,04398593         | interleukin 32                                      |
| <i>VNN1</i>      | 6,01           | 5,78          | 0,23           | 0,90            | 0,45           | 0,70           | 0,9869505          | 0,0037962            | 0,28916071          | 0,04644295         | vanin 1                                             |
| <i>SCGB3A2</i>   | 9,42           | 9,08          | 0,24           | 0,86            | -0,38          | -0,57          | 0,888547           | 0,00185752           | 0,19798177          | 0,02312812         | secretoglobin family 3A member 2                    |
| <i>STX3</i>      | 9,65           | 8,15          | 0,24           | 0,83            | 0,55           | 0,76           | 0,9340848          | 0,00308607           | 0,12547651          | 0,01218963         | syntaxin 3                                          |
| <i>MLF1</i>      | 6,23           | 9,06          | 0,39           | 0,76            | 0,42           | 0,64           | 0,7483777          | 0,00880052           | 0,28150507          | 0,04803652         | myeloid leukemia factor 1                           |
| <i>LCP1</i>      | 8,27           | 5,98          | 0,24           | 0,70            | 0,66           | 1,00           | 0,9846753          | 0,01401819           | 0,19327779          | 0,01892154         | lymphocyte cytosolic protein 1                      |
| <i>TNFRSF10D</i> | 6,87           | 11,71         | 0,35           | 0,60            | 0,59           | 0,85           | 0,7232364          | 0,01152233           | 0,15080498          | 0,01337906         | TNF receptor superfamily member 10d                 |
| <i>ZNF219</i>    | 14,00          | 11,39         | -0,26          | -0,60           | -0,50          | -0,73          | 0,8743152          | 0,01164713           | 0,13180294          | 0,00950642         | zinc finger protein 219                             |
| <i>ZNF57</i>     | 9,72           | 8,09          | -0,29          | -0,61           | 0,44           | 0,68           | 0,8703199          | 0,01474104           | 0,22056397          | 0,02715204         | zinc finger protein 57                              |
| <i>SEPHS2</i>    | 13,35          | 12,60         | -0,23          | -0,69           | 0,64           | 0,60           | 0,9997134          | 0,03834416           | 0,03509569          | 0,01728295         | selenophosphate synthetase 2                        |
| <i>CD14</i>      | 7,20           | 10,46         | -0,33          | -0,72           | -0,66          | -0,66          | 0,7431268          | 0,00470367           | 0,1401483           | 0,04368007         | CD14 molecule                                       |
| <i>HSD17B7</i>   | 9,90           | 7,42          | -0,40          | -1,06           | 0,45           | 0,54           | 0,875209           | 0,00624361           | 0,19798177          | 0,04375132         | hydroxysteroid 17-beta dehydrogenase 7              |
| <i>AFMID</i>     | 10,36          | 8,02          | -0,30          | -1,14           | 0,31           | 0,61           | 0,9303207          | 0,00194641           | 0,32597486          | 0,02985156         | arylformamidase                                     |

|                |       |       |       |       |       |       |           |            |            |            |                                                 |
|----------------|-------|-------|-------|-------|-------|-------|-----------|------------|------------|------------|-------------------------------------------------|
| <i>PAQR8</i>   | 9,45  | 6,94  | -0,29 | -1,15 | -0,45 | -0,58 | 0,9997134 | 0,01394168 | 0,20145951 | 0,03977864 | progesterin and adipoQ receptor family member 8 |
| <i>A1BG</i>    | 8,24  | 8,45  | -0,34 | -1,20 | 0,56  | 0,72  | 0,9609636 | 0,00421207 | 0,08158214 | 0,00878566 | alpha-1-B glycoprotein                          |
| <i>CCDC142</i> | 9,54  | 9,41  | -0,50 | -1,24 | 0,34  | 0,53  | 0,9120202 | 0,0110313  | 0,22542515 | 0,02843037 | coiled-coil domain containing 142               |
| <i>C4BPB</i>   | 13,44 | 6,95  | -0,44 | -1,39 | 0,77  | 0,96  | 0,9028059 | 0,00345601 | 0,19327779 | 0,03783895 | complement component 4 binding protein beta     |
| <i>PCSK9</i>   | 12,57 | 11,00 | -0,62 | -2,39 | -0,46 | -0,78 | 0,9854096 | 0,00403897 | 0,2184559  | 0,01867886 | proprotein convertase subtilisin/kexin type 9   |

---
